# Supplementary material for: Blocking the Wnt/β-Catenin Pathway by Lentivirus-Mediated Short Hairpin RNA Targeting β-Catenin Gene Suppresses Silica-Induced Lung Fibrosis in Mice
Source: MDPI journal article supplement (doi:10.3390/ijerph120910739), 2015-09-01
Supplement: s1 [file s1]

# Blocking the Wnt/ $\beta$ -Catenin Pathway by Lentivirus-Mediated Short Hairpin RNA Targeting $\beta$ -Catenin Gene Suppresses Silica-Induced Lung Fibrosis in Mice

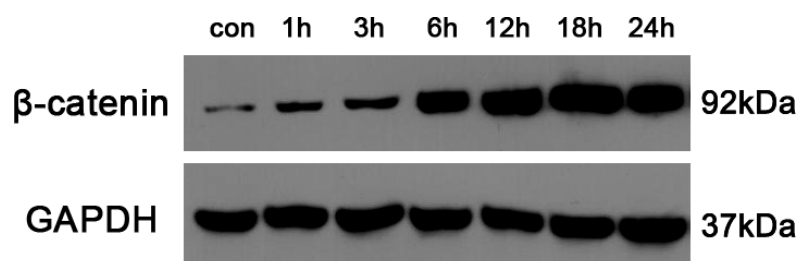

**Figure S1.** Protein level of  $\beta$ -catenin in the silica-treated MLE-12 cells at each time point.

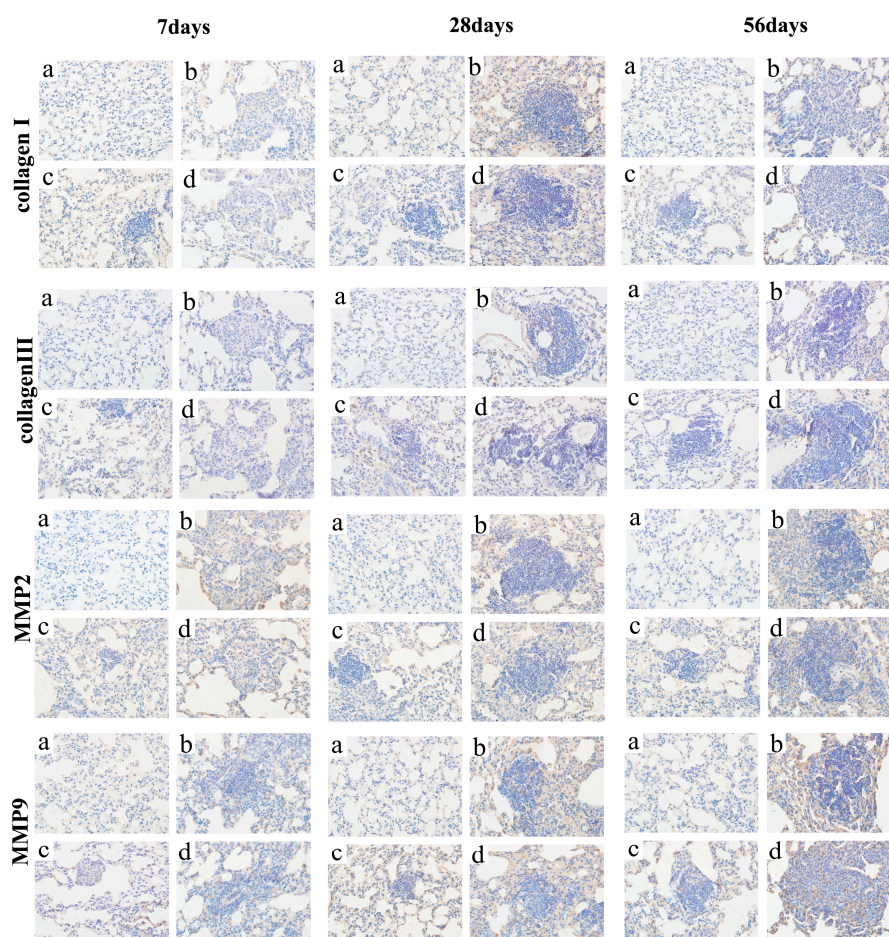

**Figure S2.** Immunohistochemical staining for collagen I, collagen III, MMP2 and MMP9 at each time point ( $\times 400$ ).
